# Supplementary material
Source: Springer Nature journal article supplement (https://www.springermedizin.de/resource/supplementary/13075_2009_3030_MOESM3_ESM.pdf/9693376)

Philips 1<sup>st</sup> – Philips 2<sup>nd</sup>

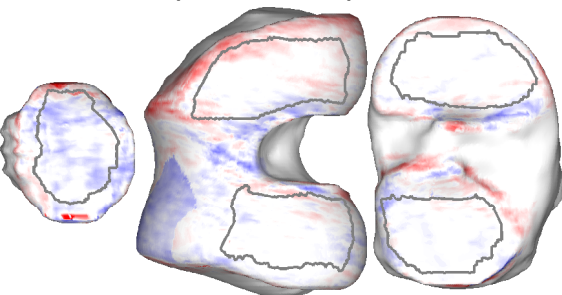

Philips – Siemens

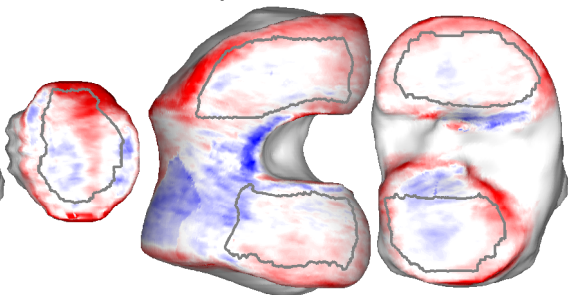

Siemens – GE

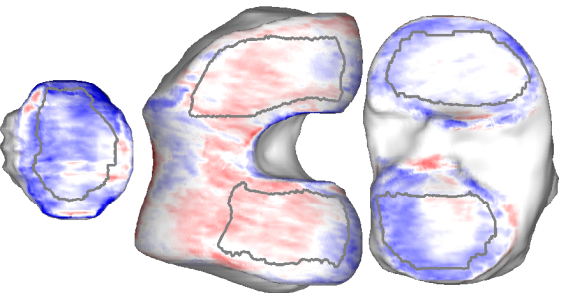

Philips – GE

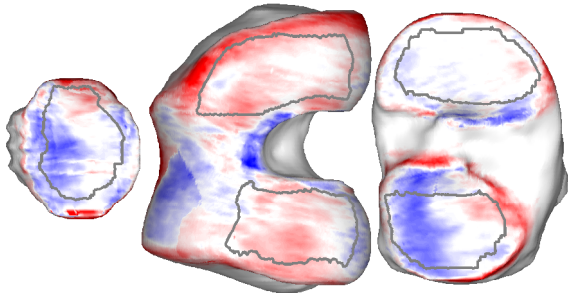

Difference in Cartilage Thickness (mm)

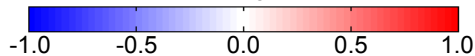

Supplement: MOESM3 [file 9693376]
